# Supplementary material
Source: publisher figshare collection journal article supplement (https://acs.figshare.com/ndownloader/files/3902260)
Supplement: Supplementary file 1 [file 3902260]

# Supporting Information

## A Theoretical Study on the UVR8 Photoreceptor: Sensing Ultraviolet-B by Tryptophan and Dissociation of Homodimer

Xin Li,<sup>\*,†</sup> Lung Wa Chung,<sup>§,‡</sup> Keiji Morokuma,<sup>\*,‡</sup> and Guohui Li<sup>\*,†</sup>

<sup>†</sup>State Key Lab of Molecular Reaction Dynamics, Dalian Institute of Chemical Physics, Dalian 116023, China, <sup>‡</sup>Fukui Institute for Fundamental Chemistry, Kyoto University, Kyoto 606-8103, Japan and <sup>§</sup>South University of Science and Technology of China, Shenzhen, Guangdong 518055, China

E-mail: lixindl@dicp.ac.cn; morokuma.keiji.3a@kyoto-u.ac.jp

### Table of Contents

|                                                                                                                                                                           |    |
|---------------------------------------------------------------------------------------------------------------------------------------------------------------------------|----|
| <b>MD Simulation Details</b>                                                                                                                                              | S4 |
| <b>Figure S1.</b> The QM parts of tryptophan and arginine residues in ONIOM(QM:MM) calculations                                                                           | S5 |
| <b>Figure S2.</b> The key orbitals of 3-methylindole molecule in the gas phase, calculated by the HF/D95(d) method                                                        | S5 |
| <b>Figure S3.</b> The SAC-CI calculated charge distribution of 3-methylindole in the gas phase, based on the M06-2X optimized ground-state geometry                       | S6 |
| <b>Figure S4.</b> Superposition of the x-ray crystal structure and the ONIOM minimized structure of model <b>G</b>                                                        | S6 |
| <b>Figure S5.</b> (a) Bond lengths of the ground-state indole moiety, and (b) the superposition of the local indole structures and their nearby arginine residues in UVR8 | S7 |
| <b>Figure S6.</b> The HF/D95(d) calculated key orbitals of W285 <sup>qm</sup> +W233 <sup>qm</sup> in UVR8                                                                 | S8 |
| <b>Figure S7.</b> The HF/D95(d) calculated key orbitals of W285 <sup>qm</sup> +W233 <sup>qm</sup> +W337 <sup>qm</sup> in                                                  |    |

|                                                                                                                                                                                                                                  |     |
|----------------------------------------------------------------------------------------------------------------------------------------------------------------------------------------------------------------------------------|-----|
| UVR8                                                                                                                                                                                                                             | S9  |
| <b>Figure S8.</b> The local structure of triad tryptophans in the A-chain of UVR8                                                                                                                                                | S9  |
| <b>Figure S9.</b> The effect of the key positively and negatively charged residues on the charge distribution of the pyrrole moiety of W285 in (a) the $S_0$ state and (b) the $^1L_a$ excited-state equilibrium geometries      | S10 |
| <b>Figure S10.</b> The time evolution of RMSD for all residues                                                                                                                                                                   | S11 |
| <b>Figure S11.</b> The local structure around W233 in the A chain of UVR8, (a) the initial structure and (b) one structure after more than 20 ns MD simulation. (c) The atom-atom distances between W233 and R234/D129           | S11 |
| <b>Figure S12.</b> The comparison of bond lengths of W285 and W233 in the UVR8 crystal structure and ONIOM(QM:MM) optimized structures                                                                                           | S12 |
| <b>Figure S13.</b> The ONIOM optimized $^1L_a$ excited-state bond lengths of W285 and W233 in UVR8                                                                                                                               | S13 |
| <b>Figure S14.</b> Histograms of distribution of the computed absorptions and emission of the bare W285 and W233 chromophores                                                                                                    | S14 |
| <b>Figure S15.</b> The time evolution of the center of mass (COM) distance between A and B monomers in key mutants                                                                                                               | S14 |
| <b>Table S1.</b> The computed absorption energies and oscillator strengths of 3-methylindole in the gas phase                                                                                                                    | S15 |
| <b>Table S2.</b> The calculated dipole moment for 3-methylindole in the gas phase                                                                                                                                                | S15 |
| <b>Table S3.</b> The MS-CASPT2 computed absorption energies and oscillator strengths of 3-methylindole in the gas phase, with different zero-order Hamiltonians                                                                  | S16 |
| <b>Table S4.</b> The SAC-CI computed vertical absorption energies and oscillator strengths of the isolated QM models                                                                                                             | S16 |
| <b>Table S5.</b> The MS-CASPT2 computed vertical absorptions and oscillator strengths of the isolated QM models                                                                                                                  | S17 |
| <b>Table S6.</b> The ONIOM(MS-CASPT2:AMBER)-EE and MS-CASPT2 computed absorptions and oscillator strengths of tryptophans in UVR8 and the isolated QM models                                                                     | S17 |
| <b>Table S7.</b> The ONIOM(SAC-CI:AMBER)-EE and SAC-CI calculated dipole moments of tryptophans in UVR8 and the isolated QM models                                                                                               | S18 |
| <b>Table S8.</b> The SAC-CI/BS3 and ONIOM(SAC-CI/BS3:AMBER)-EE computed vertical absorption energies and oscillator strengths of the isolated QM models and tryptophans in UVR8, based on the ONIOM(B3LYP/BS:AMBER)-EE optimized |     |

|                                                                                                                                                                                                        |     |
|--------------------------------------------------------------------------------------------------------------------------------------------------------------------------------------------------------|-----|
| geometries                                                                                                                                                                                             | S18 |
| <b>Table S9.</b> The ONIOM(SAC-CI:AMBER)-EE calculated Mulliken charge of W285 in UVR8, based on the ONIOM(M06-2X:AMBER)-EE optimized ground-state structure                                           | S19 |
| <b>Table S10.</b> The computed $^1L_a \rightarrow S_0$ transition energies and oscillator strengths of the isolated QM models                                                                          | S19 |
| <b>Table S11.</b> The ONIOM(SAC-CI:AMBER)-EE calculated charge of W233 in UVR8, based on the ONIOM optimized equilibrium structures in $S_0$ and $^1L_a$ states, with respect to the isolated QM model | S20 |
| <b>Table S12.</b> The HF/D95(d) calculated key orbitals for tryptophan in different environments                                                                                                       | S21 |
| <b>Table S13.</b> The ONIOM(SAC-CI:AMBER)-EE and SAC-CI computed average charge of the pyrrole moiety of tryptophans in UVR8 as well as the isolated QM models                                         | S21 |
| <b>References</b>                                                                                                                                                                                      | S22 |

## **MD Simulation Details.**

The molecular mechanics (MM) minimization was first performed to optimize the system. Then, the molecular dynamics (MD) simulations of 50 ps duration in the temperature ranges of 0-80, 80-160, 160-230, and 230-298 K (under constant volume conditions) were carried out to gradually heat the system. Additional 60 ps simulation was then performed in the NPT ensemble (at 298 K and 1 bar), followed by 300 ps simulation in the NVT ensemble. Subsequently, the long time-scale MD simulation in the NVT ensemble was carried out for data collection. The simulations have been conducted in periodic boundary conditions, with a cutoff radius of 12 Å for nonbonding interactions and the particle mesh Ewald method for calculating electrostatic interactions.<sup>S1</sup> Bond lengths involving hydrogen atoms were constrained by the SHAKE algorithm.<sup>S2</sup> The simulations were performed by using Leapfrog algorithm with a time step of 1 fs, and the Langevin thermostat algorithm were used to control the temperature.<sup>S3</sup> The protein structures taken from the production MD simulation (about 150-180 snapshots) were further refined by the ONIOM(QM:MM) geometry optimization.

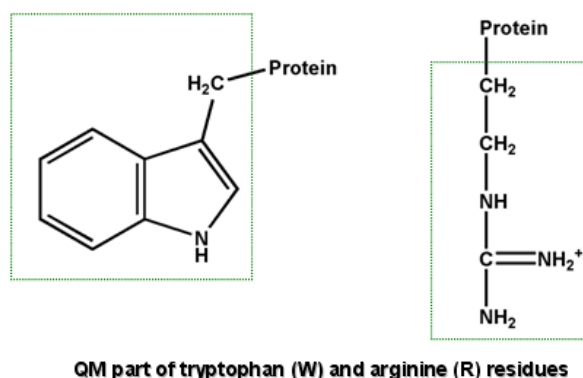

**Figure S1.** The QM parts of tryptophan (W) and arginine (R) residues in ONIOM(QM:MM) calculations.

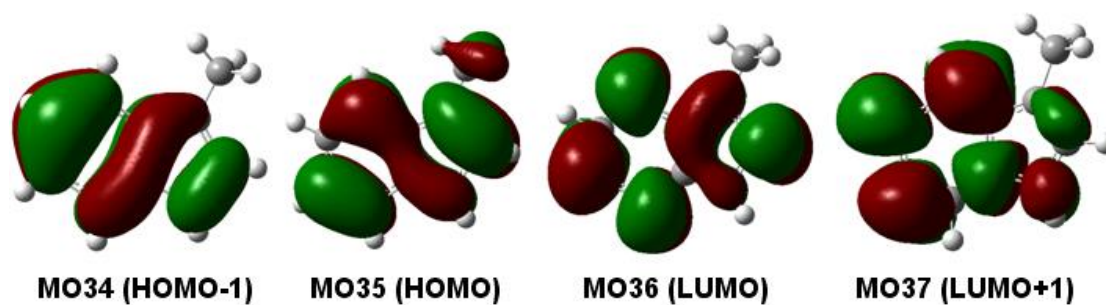

**Figure S2.** The key orbitals of 3-methylindole molecule in the gas phase, calculated by the HF/D95(d) method.

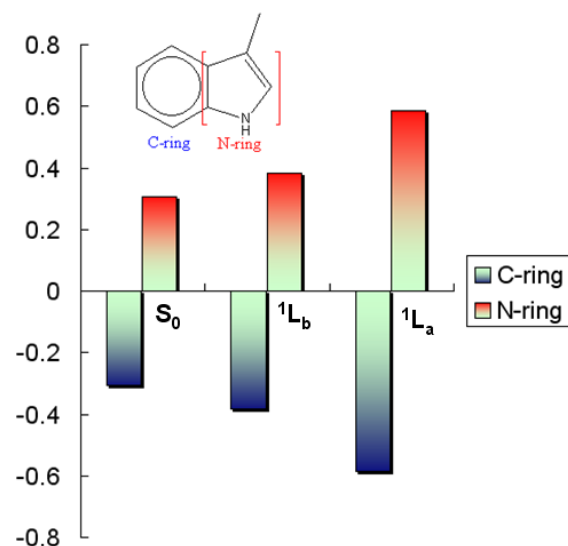

**Figure S3.** The SAC-CI calculated Mulliken charge distribution of 3-methylindole in the gas phase, based on the M06-2X optimized ground-state geometry.

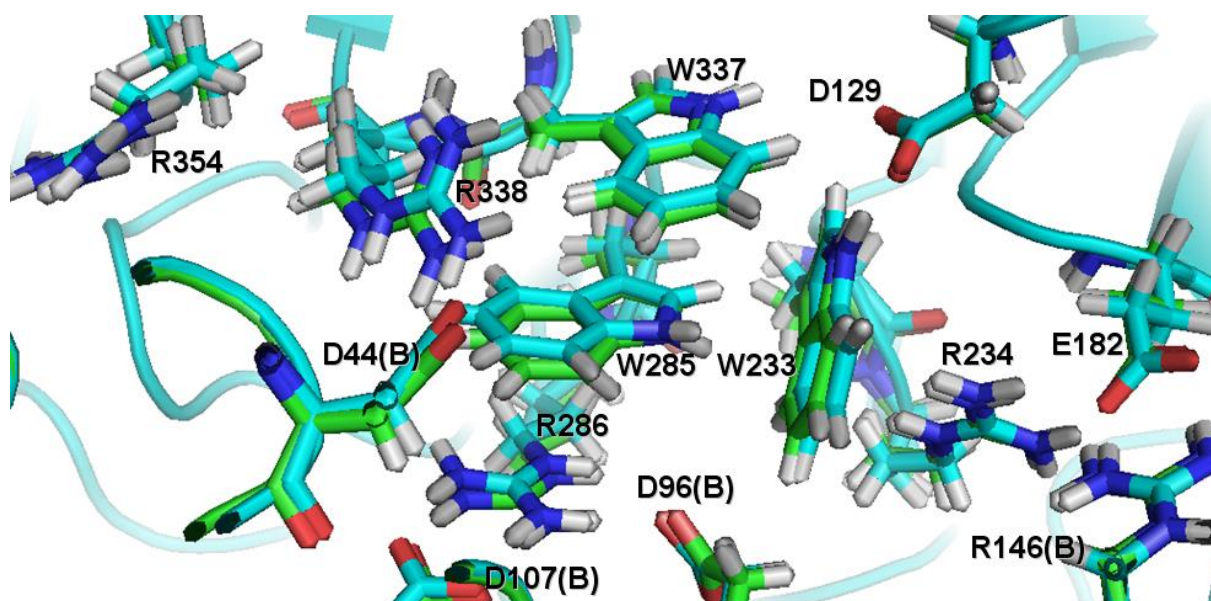

**Figure S4.** Superposition of the x-ray crystal structure (in green) and the ONIOM minimized structure of model **G** (in blue).

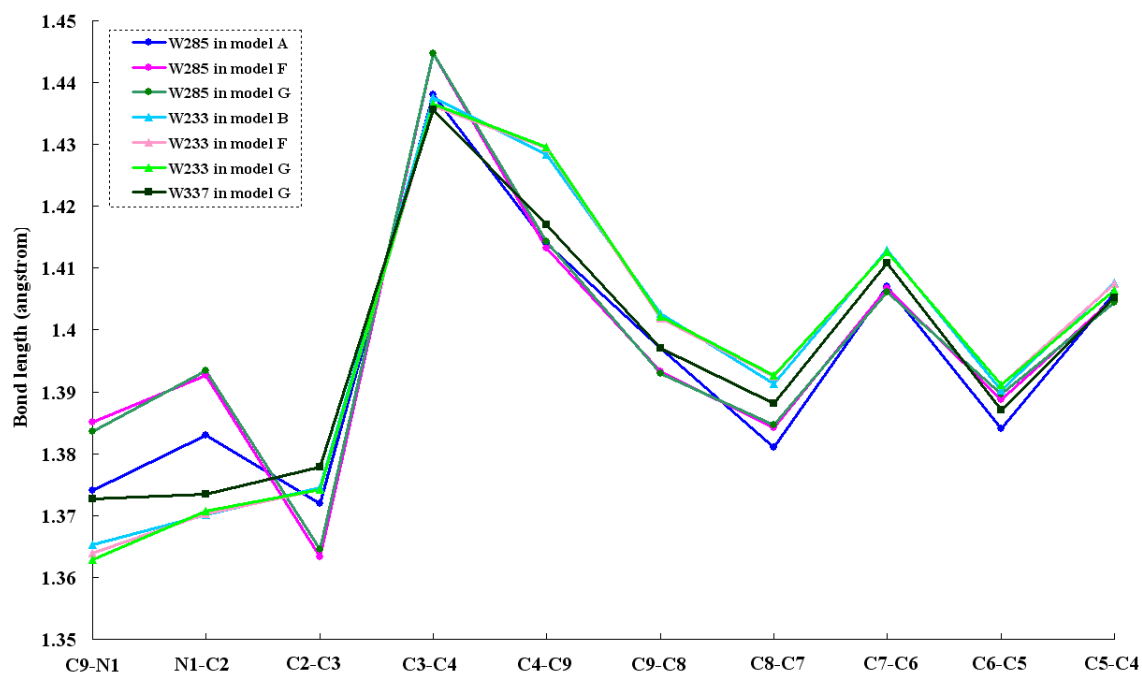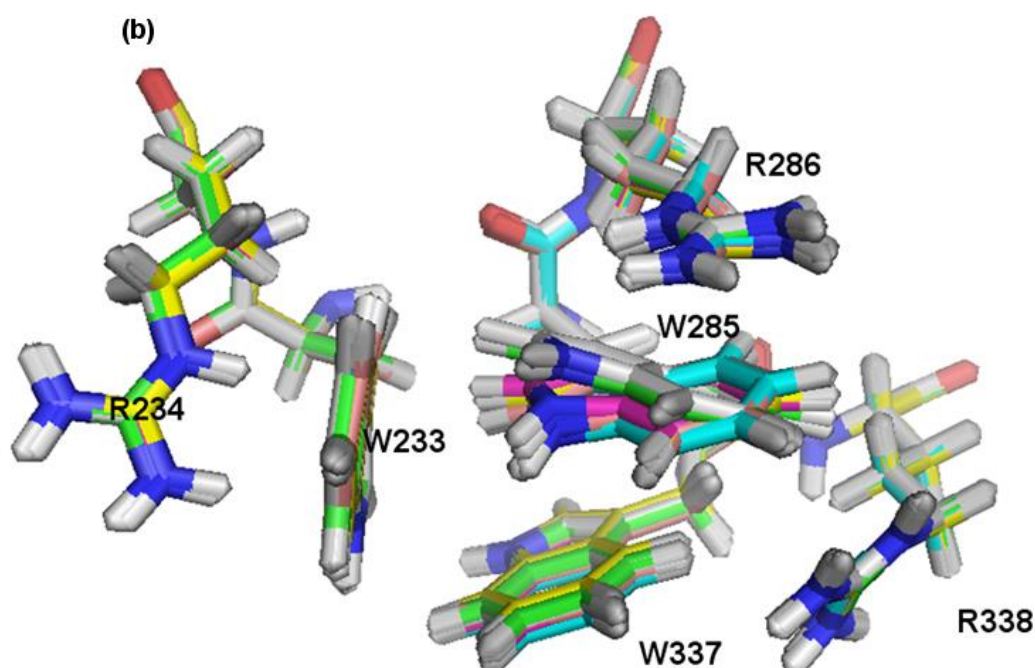

**Figure S5.** (a) Bond lengths of the ground-state indole moiety, and (b) the superposition of the local indole structures and their nearby arginine residues in UVR8, optimized by the ONIOM(M06-2X:AMBER)-EE method, for models **A** (with W285<sup>qm</sup>, green), **B** (with W233<sup>qm</sup>, cyan), **C**: (with W285<sup>qm</sup>+R286<sup>qm</sup>, pink), **D**: (with W285<sup>qm</sup>+R338<sup>qm</sup>, gray), **F**: (with W285<sup>qm</sup>+W233<sup>qm</sup>, magenta), and **G**: (with W285<sup>qm</sup>+W233<sup>qm</sup>+W337<sup>qm</sup>, yellow).

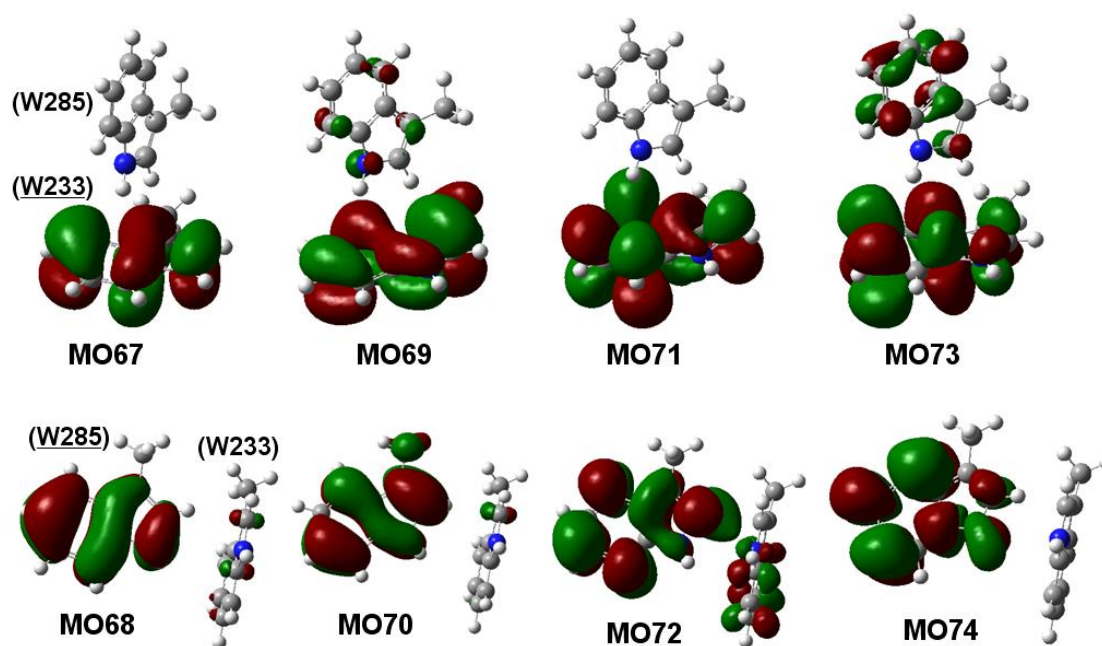

**Figure S6.** The HF/D95(d) calculated key orbitals of W285<sup>qm</sup>+W233<sup>qm</sup> (model **F**) in UVR8.



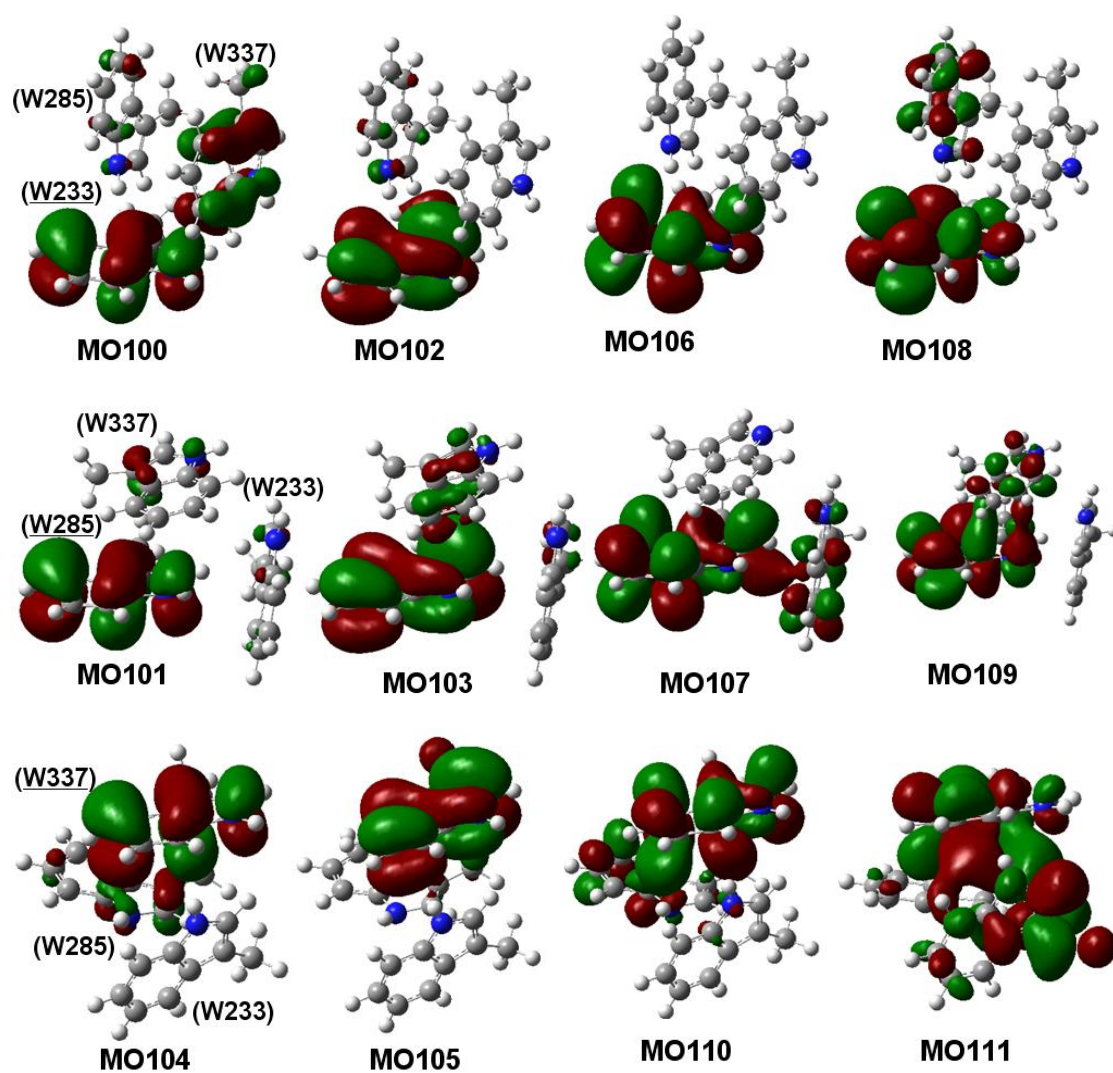

**Figure S7.** The HF/D95(d) calculated key orbitals of  $W285^{qm}+W233^{qm}+W337^{qm}$  (model G) in UVR8.

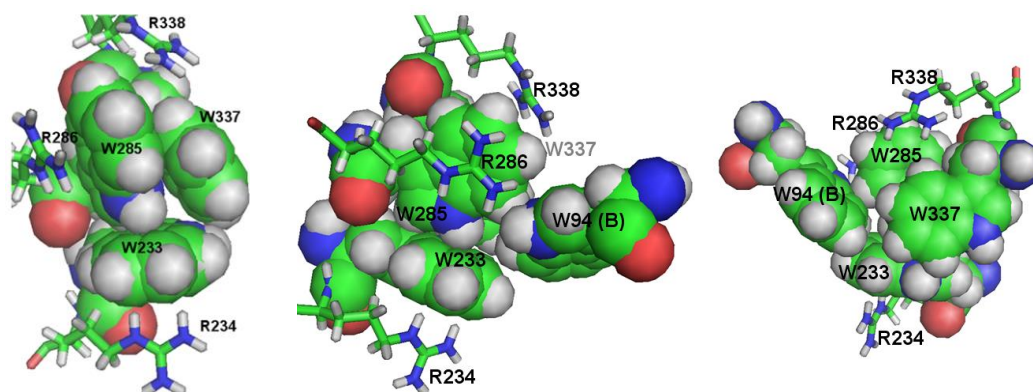

**Figure S8.** The local structure of triad tryptophans in the A-chain of UVR8.

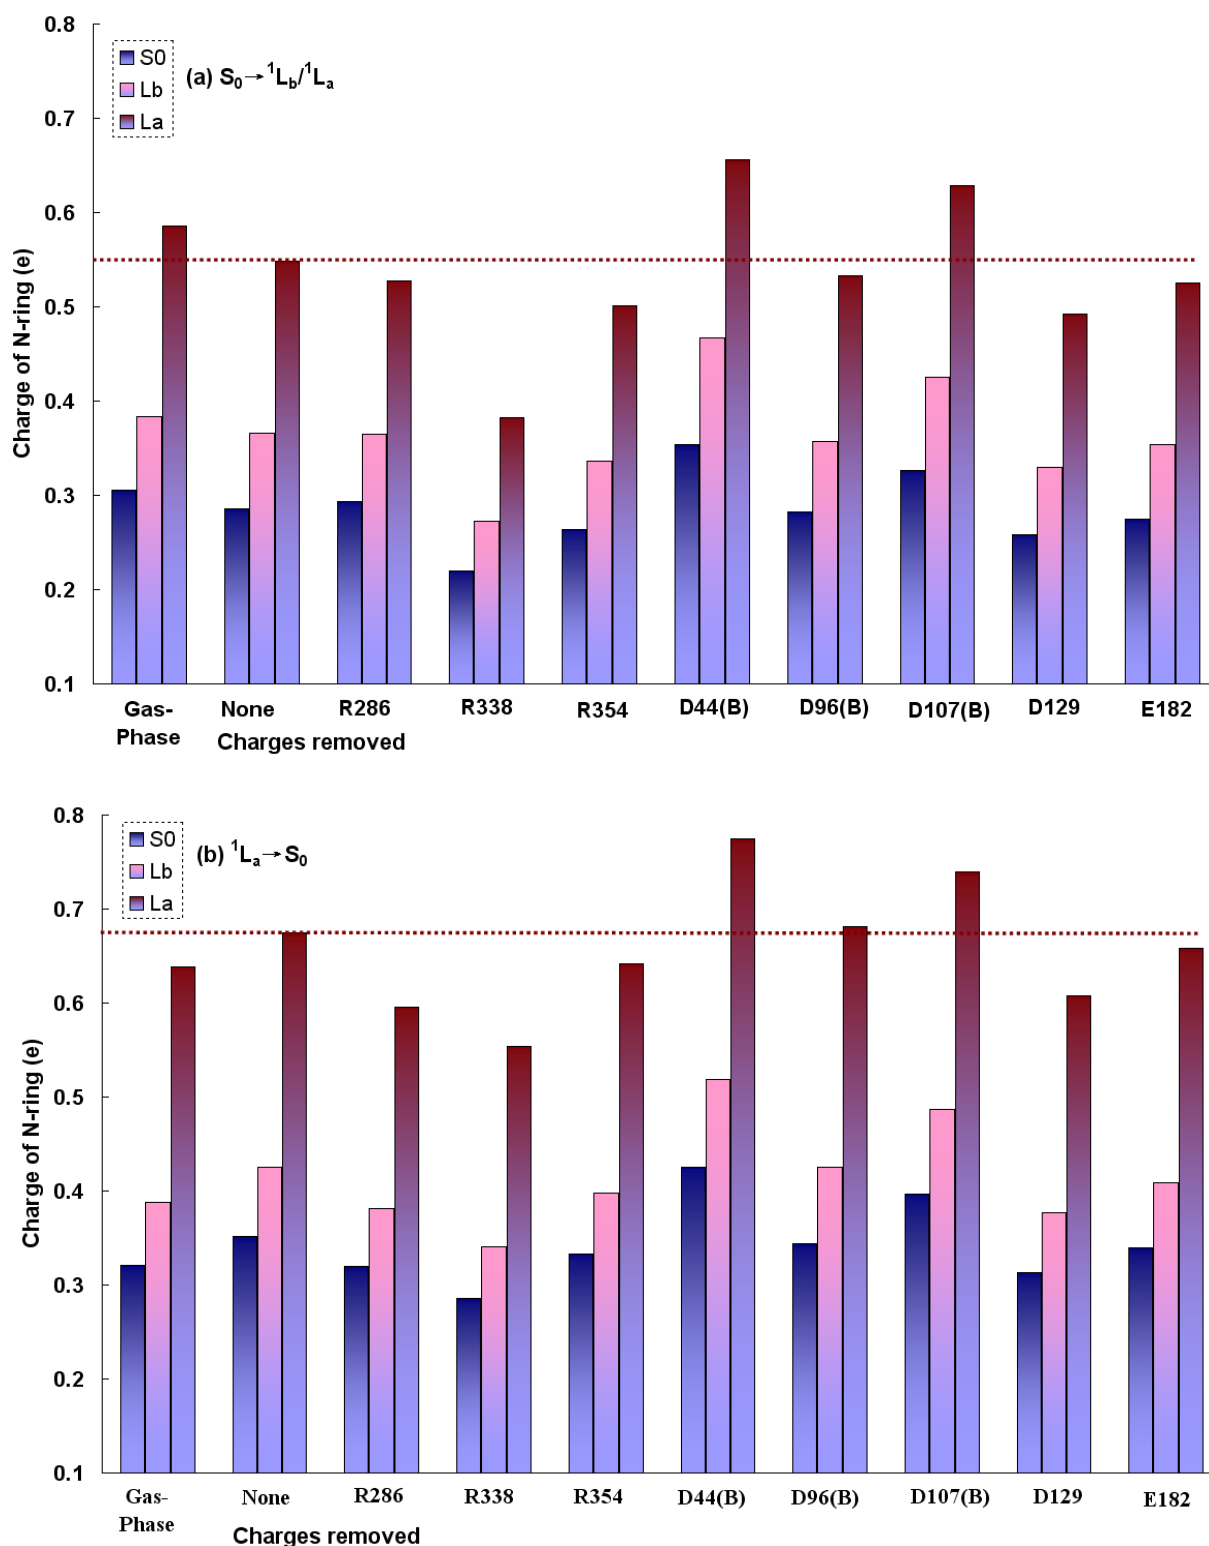

**Figure S9.** The effect of the key positively and negatively charged residues on the charge distribution of the pyrrole moiety (N-ring) of W285 in (a) the  $S_0$  state and (b) the  ${}^1L_a$  excited-state equilibrium geometries, compared with 3-methylindole in the gas phase.

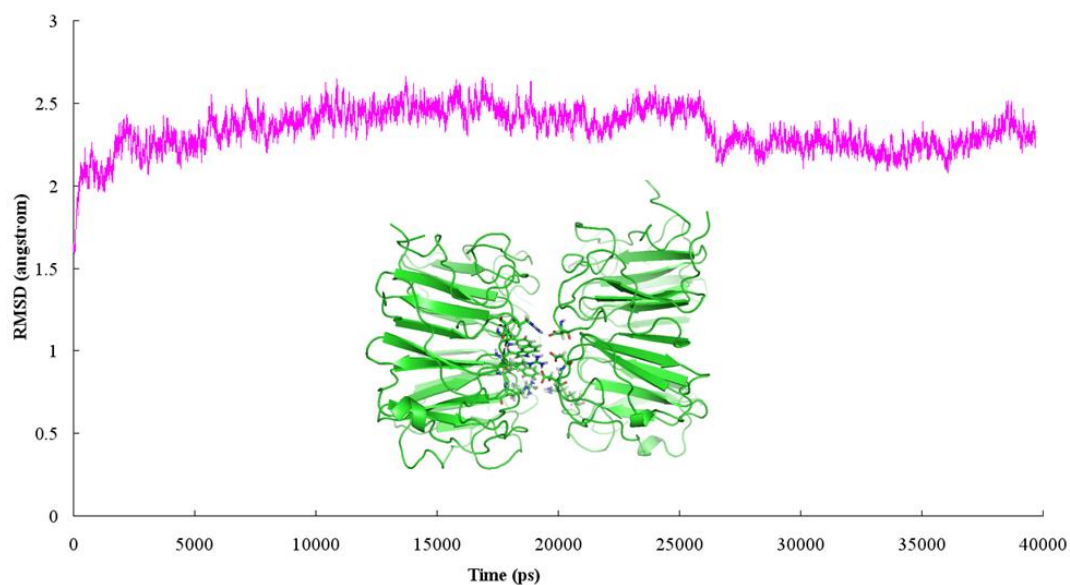

**Figure S10.** The time evolution of RMSD for all residues.

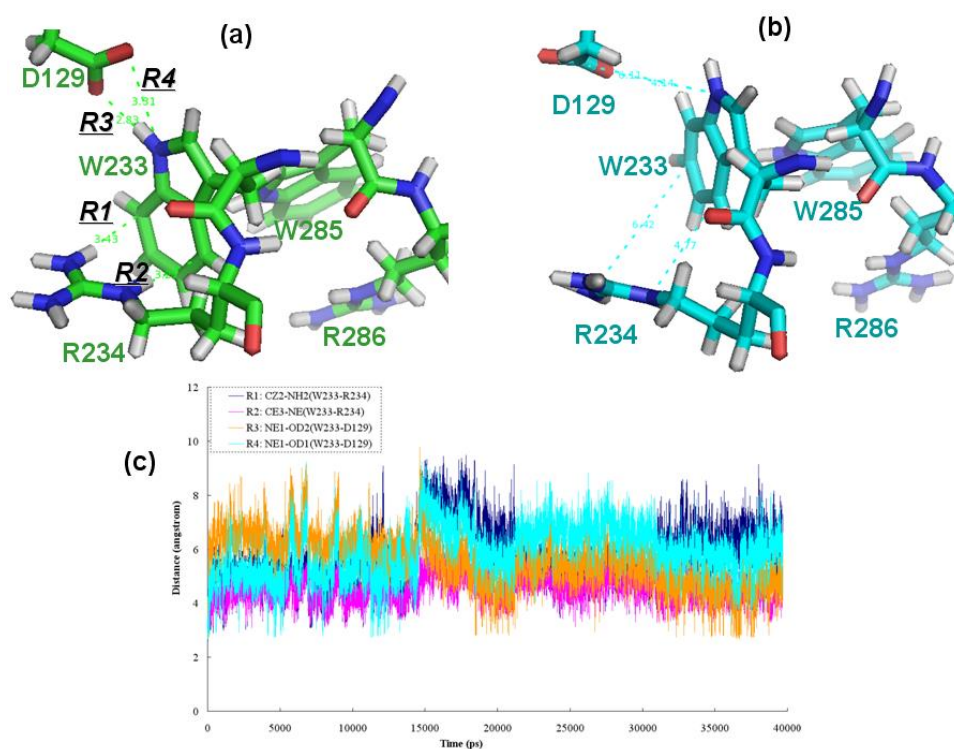

**Figure S11.** The local structure around W233 in the A chain of UVR8, (a) the initial structure (in green) and (b) one structure after more than 20 ns MD simulation (in cyan). (c) The atom-atom distances between W233 and R234/D129.

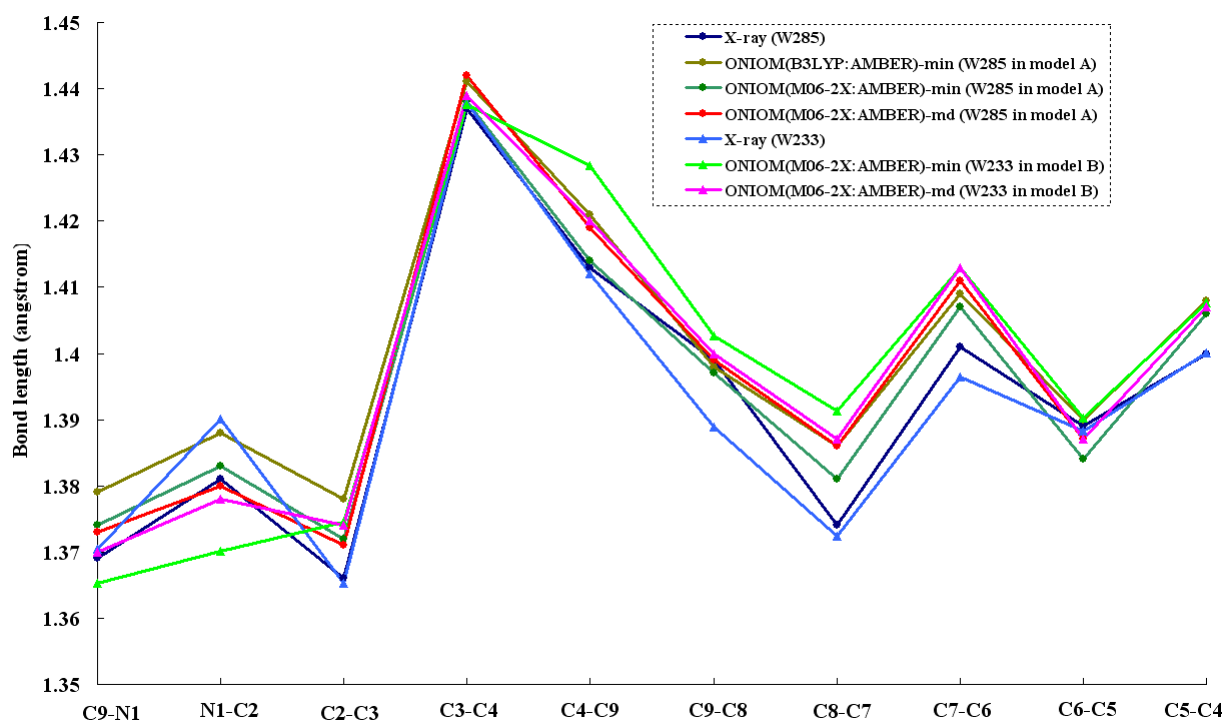

**Figure S12.** The comparison of bond lengths of W285 and W233 in the UVR8 crystal structure and ONIOM(QM:MM) optimized structures. “-min” denotes that the initial geometry is taken from the MM minimized protein structure. “-md” denotes the average bond lengths of tryptophan in the protein starting from a series of snapshots in MD simulations.

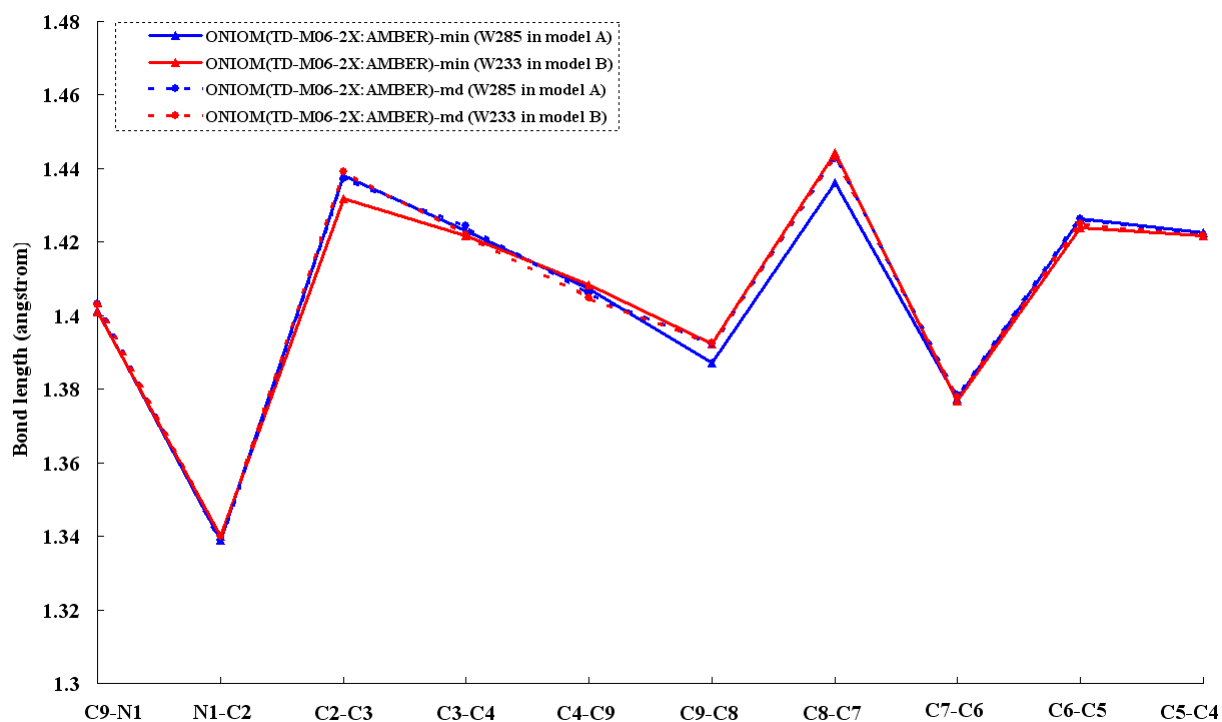

**Figure S13.** The ONIOM optimized  $^1L_a$  excited-state bond lengths of W285 and W233 in UVR8. “-min” denotes that the initial geometry is taken from the MM minimized protein structure. “-md” denotes the average bond lengths of tryptophan in the protein starting from a series of snapshots in MD simulations.

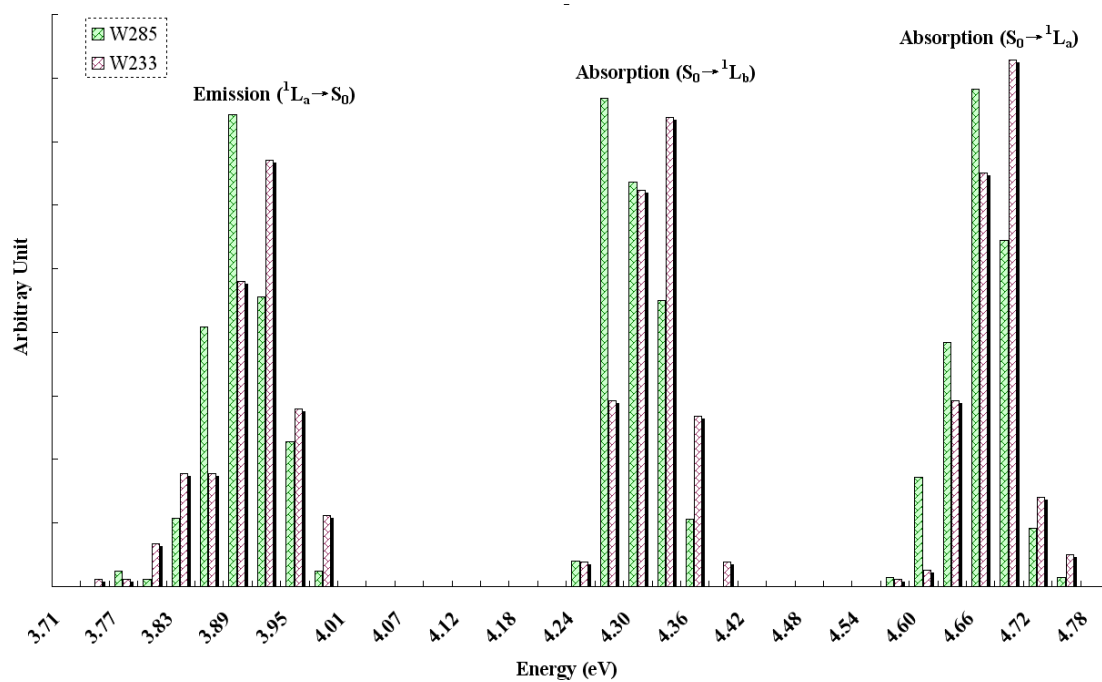

**Figure S14.** Histograms of distribution of the computed absorptions and emission of the bare W285 and W233 chromophores.

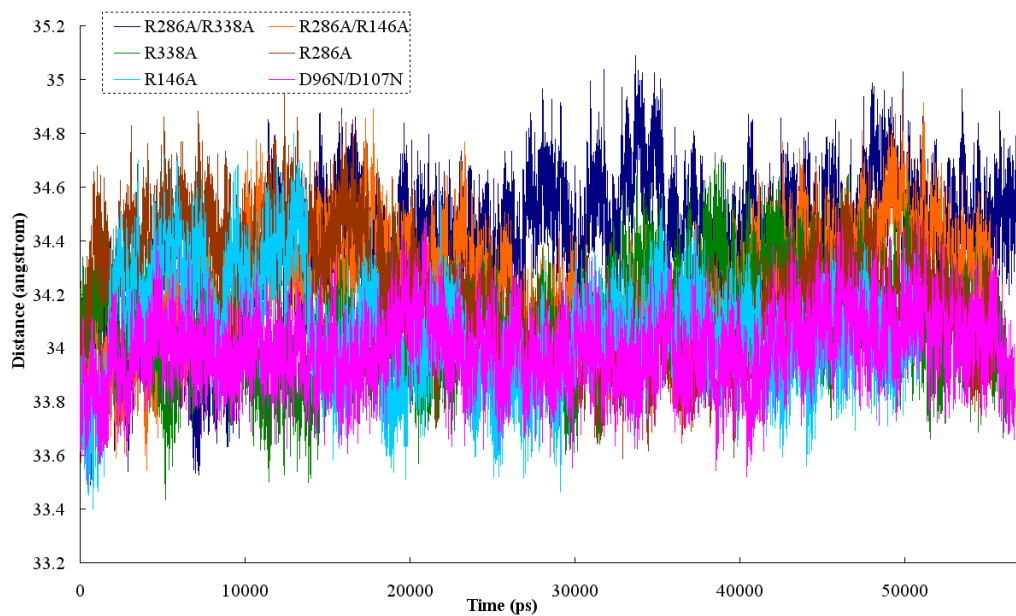

**Figure S15.** The time evolution of the center of mass (COM) distance between A and B monomers in key mutants.

**Table S1.** The computed absorption energies ( $\Delta E$ ) and oscillator strengths ( $f$ ) of 3-methylindole in the gas phase.

| Methods                     | $^1L_b$ state   |      | $^1L_a$ state   |      |
|-----------------------------|-----------------|------|-----------------|------|
|                             | $\Delta E$ (eV) | $f$  | $\Delta E$ (eV) | $f$  |
| TD-M06-L/BS1//B3LYP/BS      | 4.76            | 0.01 | 4.42            | 0.06 |
| TD-M06/BS1//M06-2X/BS       | 4.75            | 0.03 | 4.50            | 0.08 |
| TD-M06-2X/BS//M06-2X/BS     | 5.09            | 0.05 | 4.95            | 0.09 |
| TD-M06HF/BS1//M06-2X/BS     | 4.75            | 0.03 | 4.50            | 0.08 |
| TD-M05/BS1//M06-2X/BS       | 4.84            | 0.03 | 4.59            | 0.08 |
| TD-M052X/BS1//M06-2X/BS     | 5.17            | 0.05 | 5.03            | 0.09 |
| TD-SOGGA11/BS1//M06-2X/BS   | 4.63            | 0.01 | 4.25            | 0.04 |
| TD-N12SX/BS1//M06-2X/BS     | 4.89            | 0.03 | 4.63            | 0.08 |
| TD-M11/BS1//M06-2X/BS       | 5.13            | 0.07 | 5.02            | 0.08 |
| TD-MN12L/BS1//M06-2X/BS     | 4.79            | 0.04 | 4.33            | 0.06 |
| TD-B2PLYP-D/BS2//M06-2X/BS  | 4.93            | 0.07 | 4.85            | 0.08 |
| TD-B2PLYP-D3/BS2//M06-2X/BS | 4.93            | 0.07 | 4.85            | 0.08 |

**Table S2.** The calculated dipole moment ( $\mu$ ) for 3-methylindole in the gas phase.

| Methods                | $\mu$ (D) |         |         |
|------------------------|-----------|---------|---------|
|                        | $S_0$     | $^1L_b$ | $^1L_a$ |
| SAC-CI/BS3//B3LYP/BS   | 2.01      | 2.42    | 5.80    |
| SAC-CI/BS3//M06-2X/BS  | 2.01      | 2.45    | 5.85    |
| SAC-CI/BS3//CASSCF/BS4 | 2.00      | 2.50    | 5.77    |
| CASPT2/BS4//M06-2X/BS  | 1.82      | 1.70    | 6.09    |
| CASPT2/BS5//M06-2X/BS  | 1.84      | 1.72    | 6.20    |
| CASPT2/BS6//M06-2X/BS  | 1.84      | 1.74    | 6.25    |
| CASPT2/BS4//CASSCF/BS4 | 1.80      | 1.68    | 6.00    |
| CASPT2/BS5//CASSCF/BS4 | 1.84      | 1.72    | 6.14    |
| CASPT2/BS6//CASSCF/BS4 | 1.83      | 1.74    | 6.21    |

**Table S3.** The MS-CASPT2 computed absorption energies ( $\Delta E$ ) and oscillator strengths ( $f$ ) of 3-methylindole in the gas phase, with different zero-order Hamiltonians.<sup>a</sup>

| MS-CASPT2//CASSCF/6-31G* | <sup>1</sup> L <sub>b</sub> state |      | <sup>1</sup> L <sub>a</sub> state |      |
|--------------------------|-----------------------------------|------|-----------------------------------|------|
|                          | $\Delta E$ (eV)                   | $f$  | $\Delta E$ (eV)                   | $f$  |
| IMAG=0.2, IPEA=0.0       | 4.46                              | 0.02 | 5.03                              | 0.09 |
| IMAG=0.0, IPEA=0.2       | 4.75                              | 0.02 | 5.35                              | 0.09 |
| IMAG=0.1, IPEA=0.25      | 4.81                              | 0.02 | 5.41                              | 0.09 |
| IMAG=0.1, IPEA=0.0       | 4.46                              | 0.02 | 5.03                              | 0.09 |

a. For MS-CASPT2/CASSCF calculations, two different zero-order Hamiltonians for 3-methylindole in the gas-phase have been tested. Compared to the experimental absorptions of indole (4.37 and 4.77 eV), the latest IPEA Hamiltonian<sup>S4</sup> has a larger error of the computed absorptions than an imaginary level shift.

**Table S4.** The SAC-CI computed vertical absorption energies ( $\Delta E$ ) and oscillator strengths ( $f$ ) of the isolated QM models.<sup>a</sup>

| QM models                        | <sup>1</sup> L <sub>b</sub> state |      | <sup>1</sup> L <sub>a</sub> state |      |
|----------------------------------|-----------------------------------|------|-----------------------------------|------|
|                                  | $\Delta E$ (eV)                   | $f$  | $\Delta E$ (eV)                   | $f$  |
| W285 <sup>bare</sup> in <b>A</b> | 4.31                              | 0.03 | 4.66                              | 0.11 |
| W233 <sup>bare</sup> in <b>B</b> | 4.24                              | 0.02 | 4.57                              | 0.12 |
| W285 <sup>bare</sup> in <b>F</b> | 4.48                              | 0.02 | 4.77                              | 0.17 |
| W233 <sup>bare</sup> in <b>F</b> | 4.42                              | 0.03 | 4.80                              | 0.14 |
| W285 <sup>bare</sup> in <b>G</b> | 4.84                              | 0.04 | 5.17                              | 0.16 |
| W233 <sup>bare</sup> in <b>G</b> | 4.78                              | 0.04 | 5.22                              | 0.14 |
| W337 <sup>bare</sup> in <b>G</b> | 4.88                              | 0.04 | 5.27                              | 0.21 |

a. “bare” means that the isolated QM calculation was performed for the chromophore with its geometry optimized in the different ONIOM models of UVR8.



**Table S5.** The MS-CASPT2 computed vertical absorptions ( $\Delta E$ ) and oscillator strengths ( $f$ ) of the isolated QM models.<sup>a</sup>

| Methods                          | <sup>1</sup> L <sub>b</sub> state |      | <sup>1</sup> L <sub>a</sub> state |      |
|----------------------------------|-----------------------------------|------|-----------------------------------|------|
|                                  | $\Delta E$ (eV)                   | $f$  | $\Delta E$ (eV)                   | $f$  |
| W285 <sup>bare</sup> in <b>A</b> |                                   |      |                                   |      |
| MS-CASPT2/BS4                    | 4.47                              | 0.02 | 4.99                              | 0.09 |
| MS-CASPT2/BS5                    | 4.36                              | 0.02 | 4.77                              | 0.09 |
| MS-CASPT2/BS6                    | 4.23                              | 0.02 | 4.57                              | 0.10 |
| W233 <sup>bare</sup> in <b>B</b> |                                   |      |                                   |      |
| MS-CASPT2/BS4                    | 4.41                              | 0.02 | 4.95                              | 0.10 |
| MS-CASPT2/BS5                    | 4.30                              | 0.02 | 4.72                              | 0.10 |
| MS-CASPT2/BS6                    | 4.18                              | 0.02 | 4.52                              | 0.10 |

a. “bare” means that the isolated QM calculation was performed for the chromophore with its geometry optimized in the ONIOM model **A** or **B** of UVR8.

**Table S6.** The ONIOM(MS-CASPT2:AMBER)-EE and MS-CASPT2 computed absorptions ( $\Delta E$ ) and oscillator strengths ( $f$ ) of tryptophans in UVR8 and the isolated QM models.<sup>a</sup>

| Methods                               | <sup>1</sup> L <sub>b</sub> state |           | <sup>1</sup> L <sub>a</sub> state |           |
|---------------------------------------|-----------------------------------|-----------|-----------------------------------|-----------|
|                                       | $\Delta E$ (eV)                   | $f$       | $\Delta E$ (eV)                   | $f$       |
| W285/W285 <sup>bare</sup> in <b>F</b> |                                   |           |                                   |           |
| MS-CASPT2/BS4                         | 4.51/4.46                         | 0.01/0.02 | 5.20/5.06                         | 0.10/0.10 |
| MS-CASPT2/BS5                         | 4.40/4.35                         | 0.01/0.02 | 4.92/4.82                         | 0.11/0.10 |
| MS-CASPT2/BS6                         | 4.29/4.23                         | 0.02/0.02 | 4.68/4.61                         | 0.12/0.10 |
| W233/W233 <sup>bare</sup> in <b>F</b> |                                   |           |                                   |           |
| MS-CASPT2/BS4                         | 4.34 <sup>b</sup> /4.41           | 0.01/0.02 | 4.45 <sup>b</sup> /4.94           | 0.07/0.10 |
| MS-CASPT2/BS5                         | 4.31 <sup>c</sup> /4.30           | 0.02/0.02 | 4.18/4.71                         | 0.07/0.10 |
| MS-CASPT2/BS6                         | 4.19 <sup>c</sup> /4.18           | 0.02/0.02 | 4.01/4.51                         | 0.07/0.10 |

a. Based on the optimized geometry in the model **F**: W285<sup>qm</sup>+W233<sup>qm</sup>, the absorption energies of W285 or W233 in UVR8 and the isolated QM model were calculated. “bare” means that the isolated QM calculation was performed for the chromophore with its geometry optimized in the ONIOM model **F** of UVR8. b. The <sup>1</sup>L<sub>b</sub> and <sup>1</sup>L<sub>a</sub> states are mixed. c. The <sup>1</sup>L<sub>b</sub> state is mixed with <sup>1</sup>L<sub>a</sub> state.

**Table S7.** The ONIOM(SAC-CI:AMBER)-EE and SAC-CI calculated dipole moments ( $\mu$ ) of tryptophans in UVR8 and the isolated QM models.<sup>a</sup>

| Protein                       | $\mu$ (D)      |                             |                             | QM model                                      | $\mu$ (D)      |                             |                             |
|-------------------------------|----------------|-----------------------------|-----------------------------|-----------------------------------------------|----------------|-----------------------------|-----------------------------|
|                               | S <sub>0</sub> | <sup>1</sup> L <sub>b</sub> | <sup>1</sup> L <sub>a</sub> |                                               | S <sub>0</sub> | <sup>1</sup> L <sub>b</sub> | <sup>1</sup> L <sub>a</sub> |
| W285 in <b>A</b> <sup>b</sup> | 3.14           | 3.21                        | 5.78                        | W285 <sup>bare</sup> in <b>A</b> <sup>d</sup> | 2.03           | 2.48                        | 5.87                        |
| W233 in <b>B</b> <sup>c</sup> | 5.66           | 7.00                        | 10.16                       | W233 <sup>bare</sup> in <b>B</b> <sup>e</sup> | 2.25           | 2.63                        | 5.95                        |

- a. “bare” means that the isolated QM calculation was performed for the chromophore with its geometry optimized in the ONIOM model **A** or **B** of UVR8.
- b. CASPT2 (with BS4, BS5 and BS6) dipole moments of S<sub>0</sub>, <sup>1</sup>L<sub>b</sub> and <sup>1</sup>L<sub>a</sub> states are 2.81-3.19, 2.51-2.92 and 6.12-6.34 D, respectively.
- c. CASPT2 (with BS4, BS5 and BS6) dipole moments of S<sub>0</sub>, <sup>1</sup>L<sub>b</sub> and <sup>1</sup>L<sub>a</sub> states are 5.30-5.81, 5.38-6.02 and 9.85-10.17 D, respectively.
- d. CASPT2 (with BS4, BS5 and BS6) dipole moments of S<sub>0</sub>, <sup>1</sup>L<sub>b</sub> and <sup>1</sup>L<sub>a</sub> states are 1.80-1.83, 1.67-1.72 and 6.00-6.17 D, respectively.
- e. CASPT2 (with BS4, BS5 and BS6) dipole moments of S<sub>0</sub>, <sup>1</sup>L<sub>b</sub> and <sup>1</sup>L<sub>a</sub> states are 2.01-2.06, 1.82-1.88 and 6.10-6.29 D, respectively.

**Table S8.** The SAC-CI/BS3 and ONIOM(SAC-CI/BS3:AMBER)-EE computed vertical absorption energies ( $\Delta E$ ) and oscillator strengths ( $f$ ) of the isolated QM models and tryptophans in UVR8, based on the ONIOM(B3LYP/BS:AMBER)-EE optimized geometries.<sup>a</sup>

|                                        | <sup>1</sup> L <sub>b</sub> state |           | <sup>1</sup> L <sub>a</sub> state |           |
|----------------------------------------|-----------------------------------|-----------|-----------------------------------|-----------|
|                                        | $\Delta E$ (eV)                   | $f$       | $\Delta E$ (eV)                   | $f$       |
| W285 <sup>bare</sup> /W285 in <b>A</b> | 4.28/4.30                         | 0.03/0.03 | 4.63/4.62                         | 0.11/0.12 |
| W285 <sup>bare</sup> /W285 in <b>F</b> | 4.43/4.48                         | 0.02/0.02 | 4.78/4.89                         | 0.15/0.18 |
| W233 <sup>bare</sup> /W233 in <b>F</b> | 4.37/4.41                         | 0.03/0.02 | 4.75/4.08                         | 0.11/0.09 |
| W285 <sup>bare</sup> /W285 in <b>G</b> | 4.79/4.66                         | 0.03/0.04 | 5.08/5.10                         | 0.18/0.18 |
| W233 <sup>bare</sup> /W233 in <b>G</b> | 4.63/4.64                         | 0.03/0.02 | 5.01/4.21                         | 0.18/0.09 |
| W337 <sup>bare</sup> /W337 in <b>G</b> | 4.86/4.60                         | 0.04/0.05 | 5.15/4.77                         | 0.18/0.13 |

- a. “bare” means that the isolated QM calculation was performed for the chromophore with its geometry optimized in different ONIOM models of UVR8.

**Table S9.** The ONIOM(SAC-CI:AMBER)-EE calculated Mulliken charge of W285 in UVR8, based on the ONIOM(M06-2X:AMBER)-EE optimized ground-state structure.<sup>a</sup>

|                  |        | Charge         |                             |                             |
|------------------|--------|----------------|-----------------------------|-----------------------------|
|                  |        | S <sub>0</sub> | <sup>1</sup> L <sub>b</sub> | <sup>1</sup> L <sub>a</sub> |
| W285 in <b>A</b> | N-ring | 0.286          | 0.366                       | 0.548                       |
|                  | C-ring | -0.286         | -0.366                      | -0.548                      |
| W285 in <b>F</b> | N-ring | 0.326          | 0.425                       | 0.574                       |
|                  | C-ring | -0.312         | -0.404                      | -0.549                      |
| W285 in <b>G</b> | N-ring | 0.362          | 0.445                       | 0.596                       |
|                  | C-ring | -0.361         | -0.441                      | -0.592                      |

a. N-ring and C-ring denote the pyrrole and benzene rings of W285, respectively.

**Table S10.** The computed <sup>1</sup>L<sub>a</sub>→S<sub>0</sub> transition energies ( $\Delta E$ ) and oscillator strengths ( $f$ ) of the isolated QM models.<sup>a</sup>

| QM methods                       | <sup>1</sup> L <sub>a</sub> →S <sub>0</sub> |      |
|----------------------------------|---------------------------------------------|------|
|                                  | $\Delta E$ (eV)                             | $f$  |
| W285 <sup>bare</sup> in <b>A</b> |                                             |      |
| SAC-CI/BS3                       | 3.84                                        | 0.14 |
| MS-CASPT2/BS4                    | 4.31                                        | 0.11 |
| MS-CASPT2/BS5                    | 4.09                                        | 0.11 |
| MS-CASPT2/BS6                    | 3.91                                        | 0.12 |
| W233 <sup>bare</sup> in <b>B</b> |                                             |      |
| SAC-CI/BS3                       | 3.92                                        | 0.15 |
| MS-CASPT2/BS4                    | 4.35                                        | 0.12 |
| MS-CASPT2/BS5                    | 4.14                                        | 0.12 |
| MS-CASPT2/BS6                    | 3.96                                        | 0.12 |

a. “bare” means that the isolated QM calculation was carried out for the chromophore with its geometry optimized in the ONIOM model **A** or **B** of UVR8.

**Table S11.** The ONIOM(SAC-CI:AMBER)-EE calculated charge of W233 in UVR8, based on the ONIOM optimized equilibrium structures in  $S_0$  and  $^1L_a$  states, with respect to the isolated QM model.<sup>a</sup>

| ONIOM model <b>B</b>                                   |         | Charge of N-ring |         |         |
|--------------------------------------------------------|---------|------------------|---------|---------|
|                                                        |         | $S_0$            | $^1L_b$ | $^1L_a$ |
| $S_0$ State Geometry                                   |         |                  |         |         |
| W233 <sup>bare</sup> in <b>B</b>                       |         | 0.316            | 0.380   | 0.581   |
| W233 in <b>B</b>                                       |         | 0.379            | 0.498   | 0.718   |
| W233 in <b>B</b> with removal<br>of side-chain charges | R146(B) | 0.355            | 0.462   | 0.682   |
|                                                        | E182    | 0.398            | 0.521   | 0.744   |
|                                                        | D129    | 0.291            | 0.378   | 0.599   |
|                                                        | R234    | 0.333            | 0.411   | 0.606   |
| $^1L_a$ State Geometry                                 |         |                  |         |         |
| W233 <sup>bare</sup> in <b>B</b>                       |         | 0.324            | 0.392   | 0.623   |
| W233 in <b>B</b>                                       |         | 0.426            | 0.535   | 0.787   |
| W233 in <b>B</b> with removal<br>of side-chain charges | R146(B) | 0.407            | 0.521   | 0.771   |
|                                                        | E182    | 0.435            | 0.545   | 0.797   |
|                                                        | D129    | 0.334            | 0.426   | 0.683   |
|                                                        | R234    | 0.359            | 0.438   | 0.681   |

a. N-ring denotes the pyrrole ring of W233. "bare" means that the isolated QM calculation was performed for the chromophore with its geometry optimized in the ONIOM model **B** of UVR8.

**Table S12.** The HF/D95(d) calculated key orbitals for tryptophan in different environments.<sup>a</sup>

| Main configuration (weight>0.2)                        |      | $\pi \rightarrow \pi^* {}^1L_b$ state                     | $\pi \rightarrow \pi^* {}^1L_a$ state                    |
|--------------------------------------------------------|------|-----------------------------------------------------------|----------------------------------------------------------|
| 3-methylindole in gas-phase                            |      | MO34→MO36(0.78),<br>MO35→MO37(-0.51)                      | MO35→MO36(0.88),<br>MO34→MO37(0.29)                      |
| W285 <sup>bare</sup> in <b>A</b>                       |      | MO34→MO36(0.78),<br>MO35→MO37(-0.50)                      | MO35→MO36(0.88),<br>MO34→MO37(0.27)                      |
| W285 in <b>A</b>                                       |      | MO34→MO36(-0.78),<br>MO35→MO37(0.51)                      | MO35→MO36(0.89),<br>MO34→MO37(0.26)                      |
| W233 <sup>bare</sup> in <b>B</b>                       |      | MO34→MO36(-0.78),<br>MO35→MO37(0.51)                      | MO35→MO36(0.89),<br>MO34→MO37(0.26)                      |
| W233 in <b>B</b>                                       |      | MO34→MO36(-0.70),<br>MO35→MO37(0.55),<br>MO35→MO36(-0.28) | MO35→MO36(0.84),<br>MO34→MO36(-0.35),<br>MO34→MO37(0.21) |
| W233 in <b>B</b> with removal<br>of side-chain charges | D129 | MO34→MO36(0.77),<br>MO35→MO37(-0.53)                      | MO35→MO36(-0.89),<br>MO34→MO37(-0.24)                    |
|                                                        | R234 | MO34→MO36(0.77),<br>MO35→MO37(-0.53)                      | MO35→MO36(-0.89),<br>MO34→MO37(-0.27)                    |

a. “bare” means that the isolated QM calculation was performed for the chromophore with its geometry optimized in the ONIOM model **A** or **B** of UVR8.

**Table S13.** The ONIOM(SAC-CI:AMBER)-EE and SAC-CI computed average charge of the pyrrole moiety of tryptophans in UVR8 as well as the isolated QM models.<sup>a</sup>

| Charge                           | S <sub>0</sub> State Geometry |                             |                             | <sup>1</sup> L <sub>a</sub> State Geometry |                             |
|----------------------------------|-------------------------------|-----------------------------|-----------------------------|--------------------------------------------|-----------------------------|
|                                  | S <sub>0</sub>                | <sup>1</sup> L <sub>b</sub> | <sup>1</sup> L <sub>a</sub> | S <sub>0</sub>                             | <sup>1</sup> L <sub>a</sub> |
| W285 in <b>A</b>                 | 0.332                         | 0.437                       | 0.629                       | 0.370                                      | 0.714                       |
| W285 <sup>bare</sup> in <b>A</b> | 0.310                         | 0.387                       | 0.588                       | 0.322                                      | 0.623                       |
| W233 in <b>B</b>                 | 0.337                         | 0.460                       | 0.620                       | 0.377                                      | 0.720                       |
| W233 <sup>bare</sup> in <b>B</b> | 0.312                         | 0.391                       | 0.587                       | 0.324                                      | 0.623                       |

a. “bare” means that the isolated QM calculation was carried out for the chromophore with its geometry optimized in the ONIOM model **A** or **B** of UVR8.

## References

---

- (S1) (a) Darden, T.; York, D.; Pedersen, L. *J. Chem. Phys.* **1993**, *98*, 10089-10092. (b) Essmann, U.; Perera, L.; Berkowitz, M. L.; Darden, T.; Lee, H.; Pedersen, L. G. *J. Chem. Phys.* **1995**, *103*, 8577-8593.
- (S2) Ryckaert, J.-P.; Ciccotti, G.; Berendsen, H. J. C. *J. Comput. Phys.* **1977**, *23*, 327-341.
- (S3) (a) Pastor, R. W.; Brooks, B. R.; Szabo, A. *Mol. Phys.* **1988**, *65*, 1409-1419. (b) Loncharich, R. J.; Brooks, B. R.; Pastor, R. W. *Biopolymers* **1992**, *32*, 523-535. (c) Izaguirre, J. A.; Catarella, D. P.; Wozniak, J. M.; Skeel, R. D. *J. Chem. Phys.* **2001**, *114*, 2090-2098.
- (S4) Ghigo, G.; Roos, B. O.; Malmqvist, P.-Å. *Chem. Phys. Lett.* **2004**, *396*, 142-149.
